# Supplementary material
Source: MDPI journal article supplement (https://www.mdpi.com/1424-2818/12/4/162)
Supplement: s1 [file s1]

## Supplementary Figures

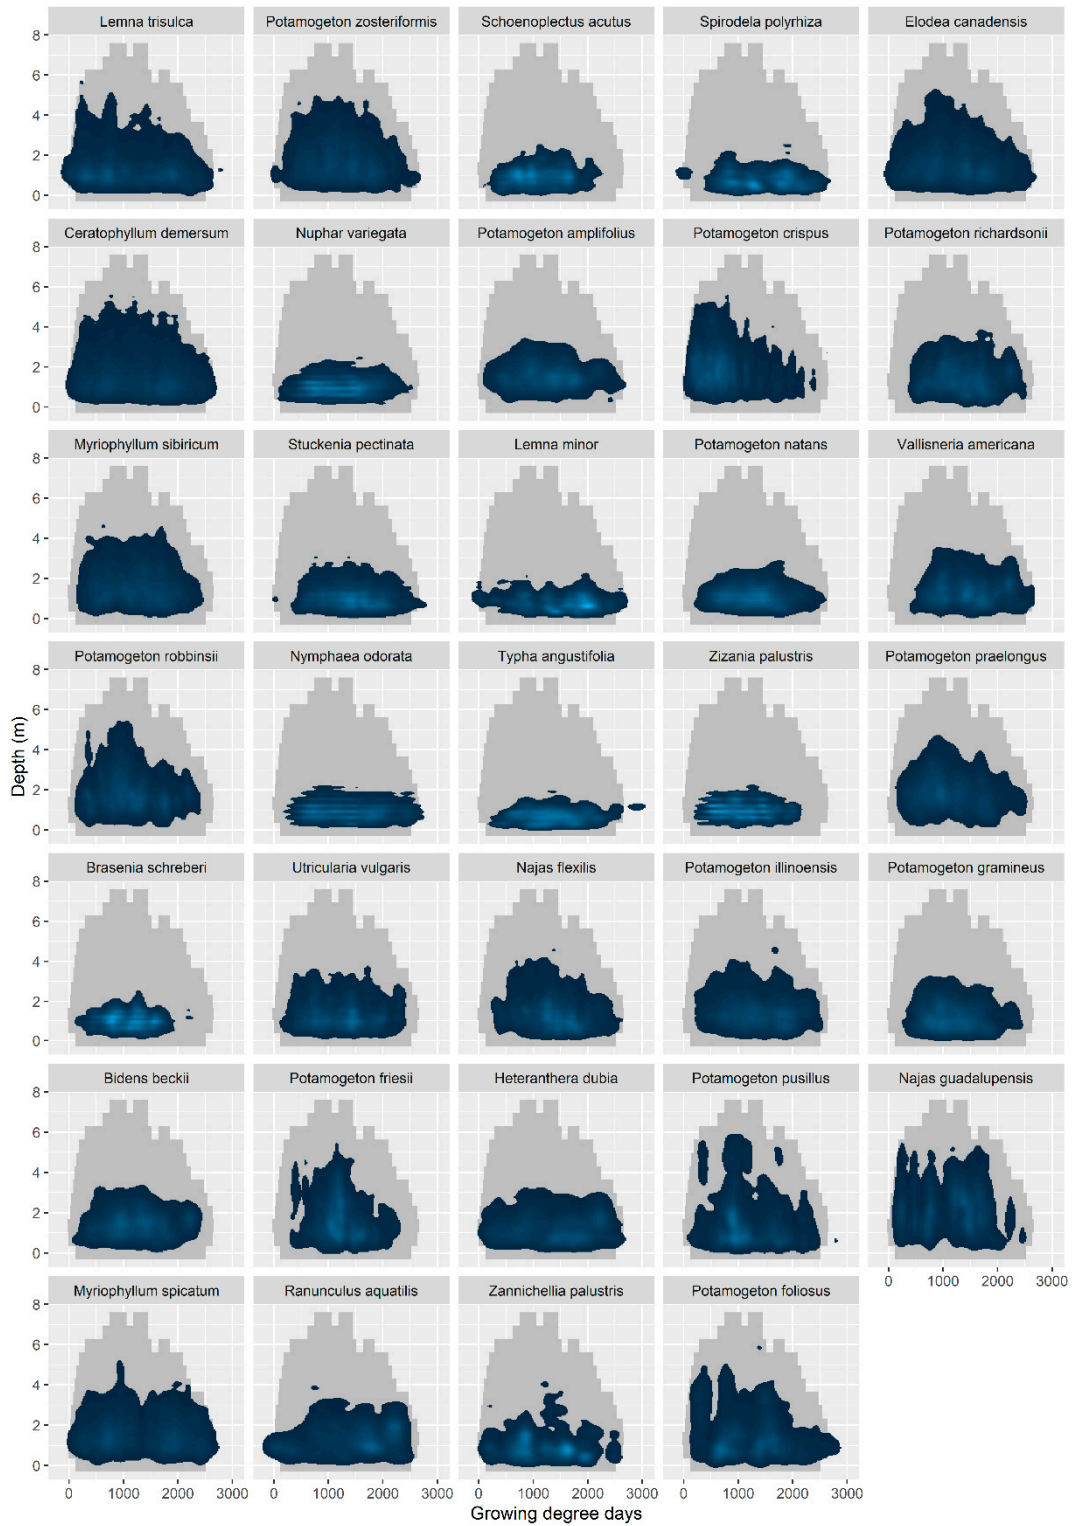

**Figure S1.** Visualizations of the phenological and depth niches for all species analyzed. Gray backgrounds show sampled space in the depicted niches, and blue clouds show the probabilistic niche occupied by each species (relative abundance shown by shading; light blue = high abundance; dark blue = low abundance).

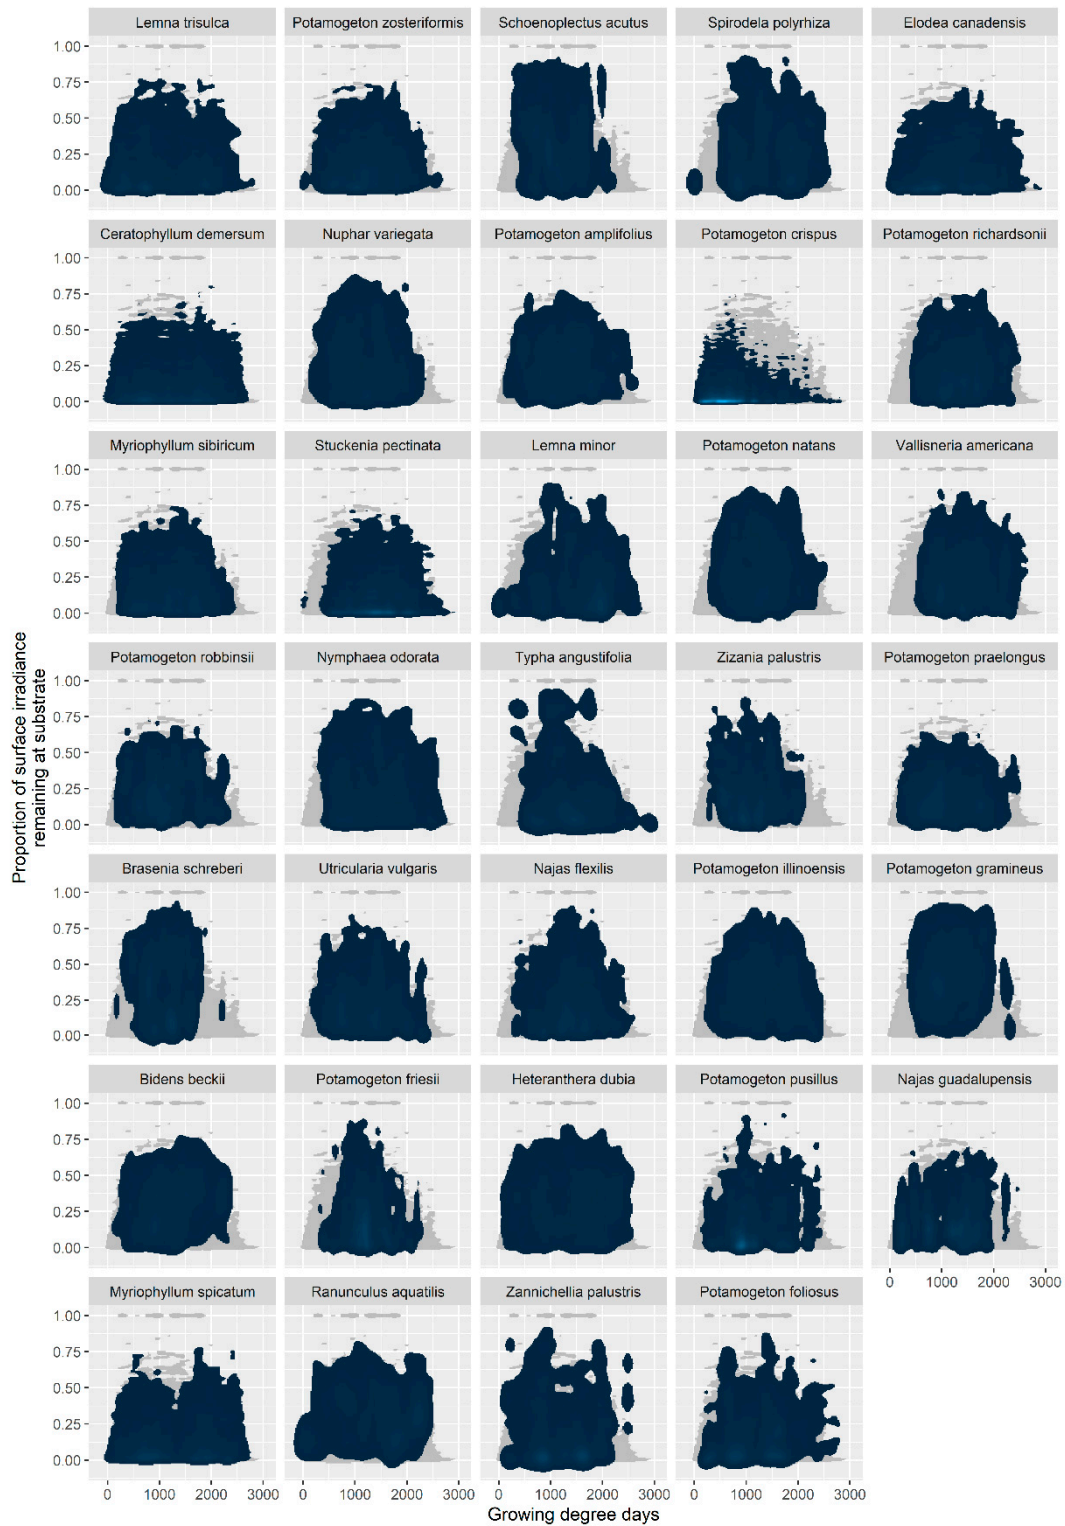

**Figure S2.** Visualizations of the phenological and light availability niches for all species analyzed. Gray backgrounds show sampled space in the depicted niches, and blue clouds show the probabilistic niche occupied by each species (relative abundance shown by shading; light blue = high abundance; dark blue = low abundance).

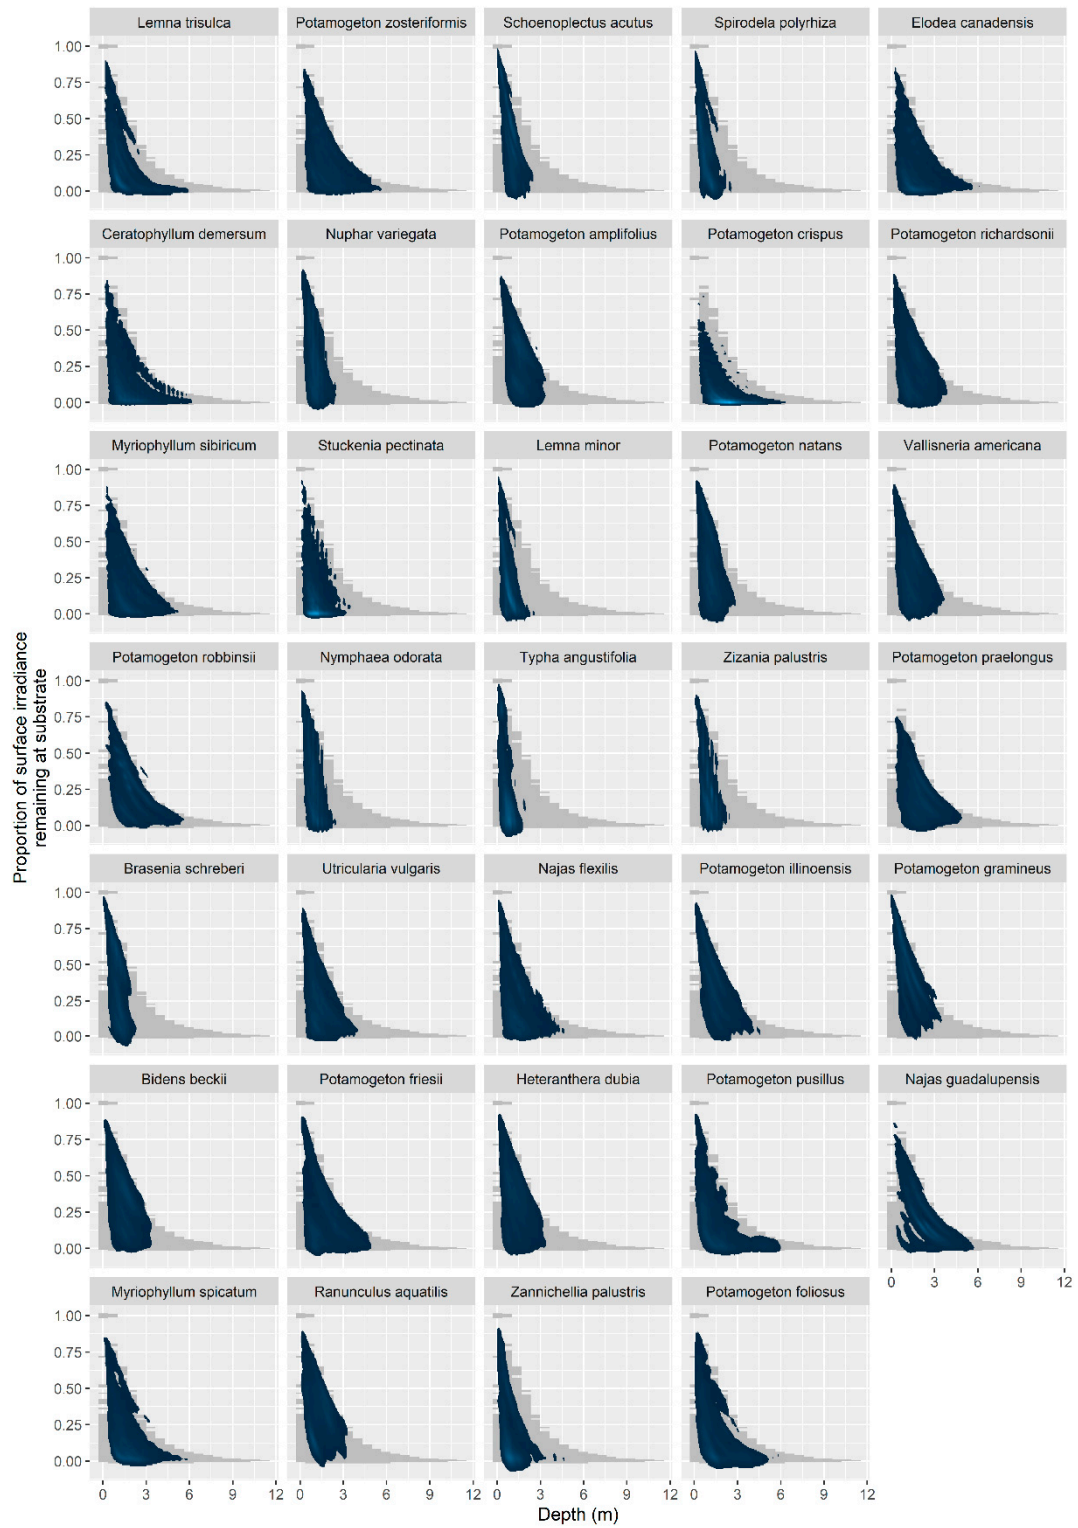

**Figure S3.** Visualizations of the depth and light availability niches for all species analyzed. Gray backgrounds show sampled space in the depicted niches, and blue clouds show the probabilistic niche occupied by each species (relative abundance shown by shading; light blue = high abundance; dark blue = low abundance).
